# Supplementary material
Source: PubMed Central journal article supplement (PMC9798739)
Supplement: ao2c04671_si_001.pdf [file ao2c04671_si_001.pdf]

1 **In vitro Screening and MD simulations of thiourea derivatives against SARS-CoV-2 in**  
2 **association with multidrug resistance ABCB1 transporter**

3 **Mohammad Assad<sup>1</sup>, Zahida Parveen<sup>1\*</sup>, Saira Farman<sup>1</sup>, Beenish Khurshid<sup>1</sup>, Muhammad**  
4 **Ali Hashmi<sup>2</sup>, Khalid Mohammed Khan<sup>3</sup>, Akif Khurshid<sup>1</sup>**

5 <sup>1</sup>Department of Biochemistry, Abdul Wali Khan University, Mardan, 23200, Khyber  
6 Pakhtunkhwa, Pakistan,

7 <sup>2</sup>Department of Chemistry, Division of Science and Technology, University of Education,  
8 54770, Lahore Pakistan

9 <sup>3</sup>H. E. J. Research Institute of Chemistry. International Center for Chemical and Biological  
10 Sciences. University of Karachi

11 **\* Correspondence:**

12 Dr. Zahida Parveen, PhD (Associate Professor)

13 Department of Biochemistry, Abdul Wali Khan University, Mardan, Khyber Pakhtunkhwa,  
14 Pakistan

15 Email: [zahida@awkum.edu.pk](mailto:zahida@awkum.edu.pk)

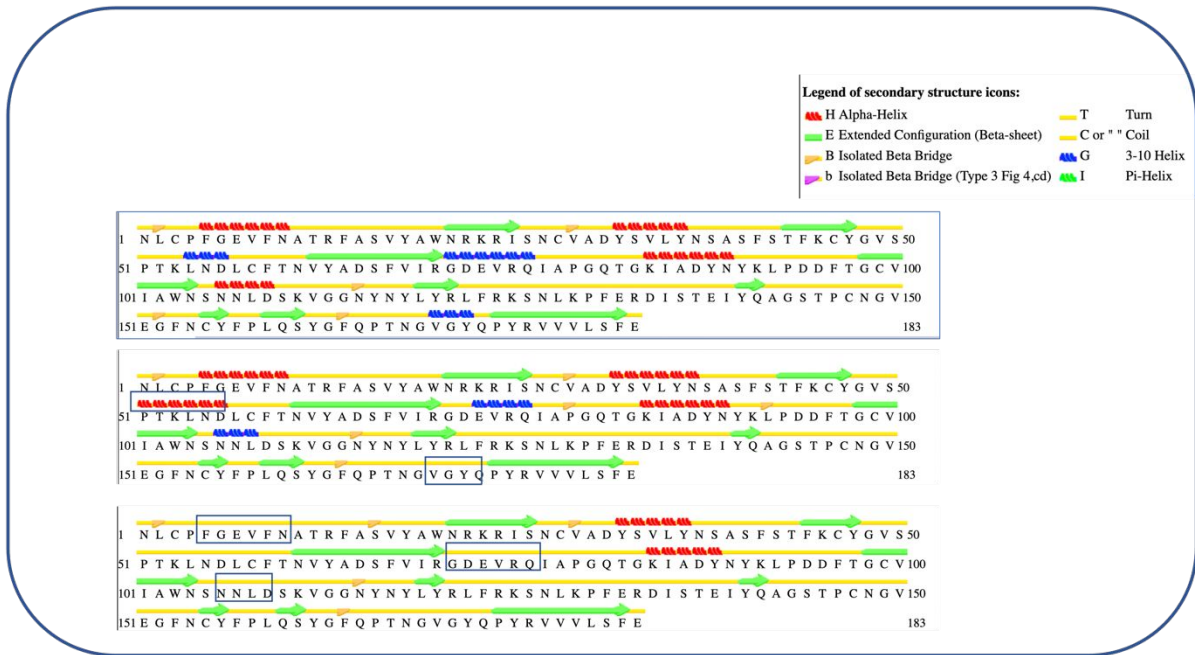

17

18 Figure SI- 1. This figure compares the secondary structure changes in the crystal structure  
 19 (upper panel), BB-IV-46 (middle panel) and BB-V-19 (lower panel). This analysis done  
 20 through STRIDE (ref.<sup>1</sup>. STRIDE: a Web server for secondary structure assignment from known  
 21 atomic coordinates of proteins. Nucl. Acids Res. , 32, W500-2) shows that there are slight  
 22 changes in the secondary structure of RBD as compared to the starting structure. These changes  
 23 include the conversion of residues 5-10 from alpha-helix in BB-IV-46 to turns and coils in BB-  
 24 V-19, residues 23-26 in BB-IV-46 from 3-10 helix to turns and coils in BB-V-19 and residues  
 25 106-108 in BB-IV-46 from 3-10 helix to turns and coils in BB-V-19 as a result of ligand  
 26 binding.

27

28

29

30 (1).Heinig, M.; Frishman, D. J. N. a. r., STRIDE: a web server for secondary structure  
 31 assignment from known atomic coordinates of proteins. **2004**, 32 (suppl\_2), W500-W502.

32
